# Supplementary material for: Protein Kinase A is a Dependent Factor and Therapeutic Target in Fibrous Dysplasia
Source: Research Square preprint supplement (doi:10.21203/rs.3.rs-5522083/v1), 2024-12-05
Supplement: Supplementary file 1 [file b7320711104832391667e040.pdf]

## **Protein Kinase A is a Dependent Factor and Therapeutic Target in Fibrous Dysplasia**

| <b>Contents</b>        | <b>Page</b> |
|------------------------|-------------|
| Supplementary Figure 1 | 2           |
| Supplementary Figure 2 | 3           |
| Supplementary Figure 3 | 4           |
| Supplementary Figure 4 | 5           |
| Supplementary Figure 5 | 6           |
| Supplementary Figure 6 | 7           |

## SUPPLEMENTARY FIGURES

**a**

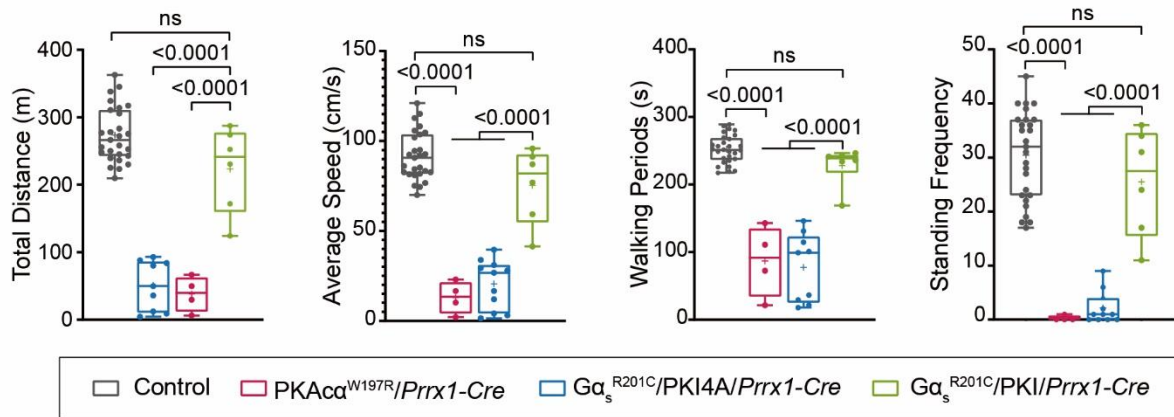

**Supplementary Fig. 1. Locomotor activity analyses.** (a) Locomotor activity analyses of PKA, FD-PKI, FD-PKI4A, and control mice, including measurements of total distance, average speed, walking periods, and standing frequency after Dox administration ( $n \geq 6$ , one-way ANOVA). The data are presented as box-and-whisker plots, with boxes representing the interquartile range (25th–75th percentiles), the minimum and maximum values reached by bars, the median plotted as a line in the middle, and the mean marked as “+”.

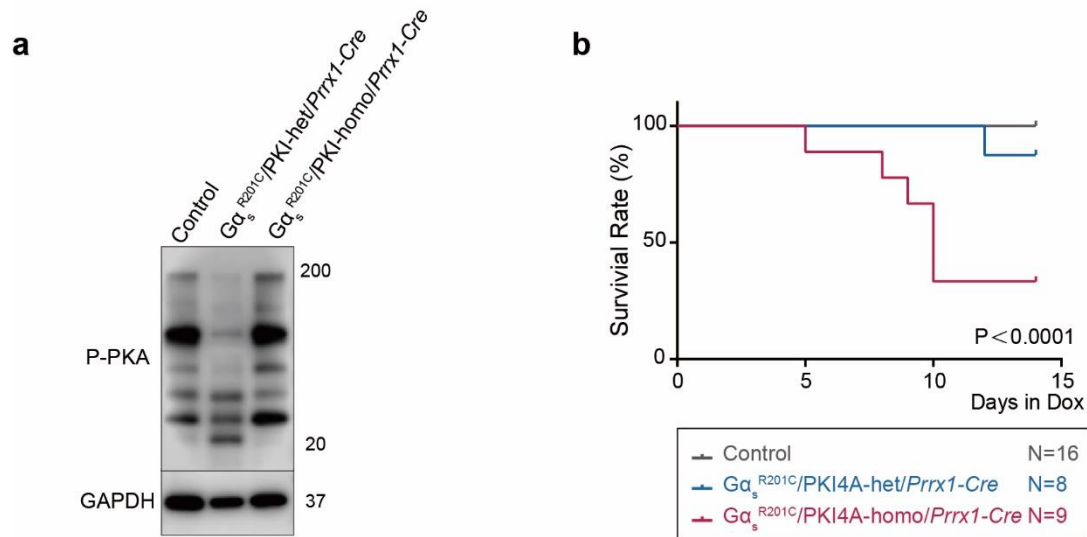

**Supplementary Fig. 2. Comparison between heterozygous and homozygous FD-PKI and FD-PKI4A mice.** (a) Immunoblotting demonstrating reduced phosphorylation levels of PKA in heterozygous FD-PKI mice (Tet- $G\alpha_s^{R201C}/PKI-het/Prrx1-Cre$ ), with no suppression observed in homozygous FD-PKI mice (Tet- $G\alpha_s^{R201C}/PKI-homo/Prrx1-Cre$ ). (b) Kaplan–Meier survival curve comparing heterozygous FD-PKI4A mice (Tet- $G\alpha_s^{R201C}/PKI4A-het/Prrx1-Cre$ ,  $n = 8$ ), homozygous FD-PKI4A mice (Tet- $G\alpha_s^{R201C}/PKI4A-homo/Prrx1-Cre$ ,  $n = 9$ ), and control mice ( $n = 16$ ), showing a significantly lower survival rate in homozygous FD-PKI4A mice (33.3%) than in heterozygous FD-PKI4A mice (87.5%).

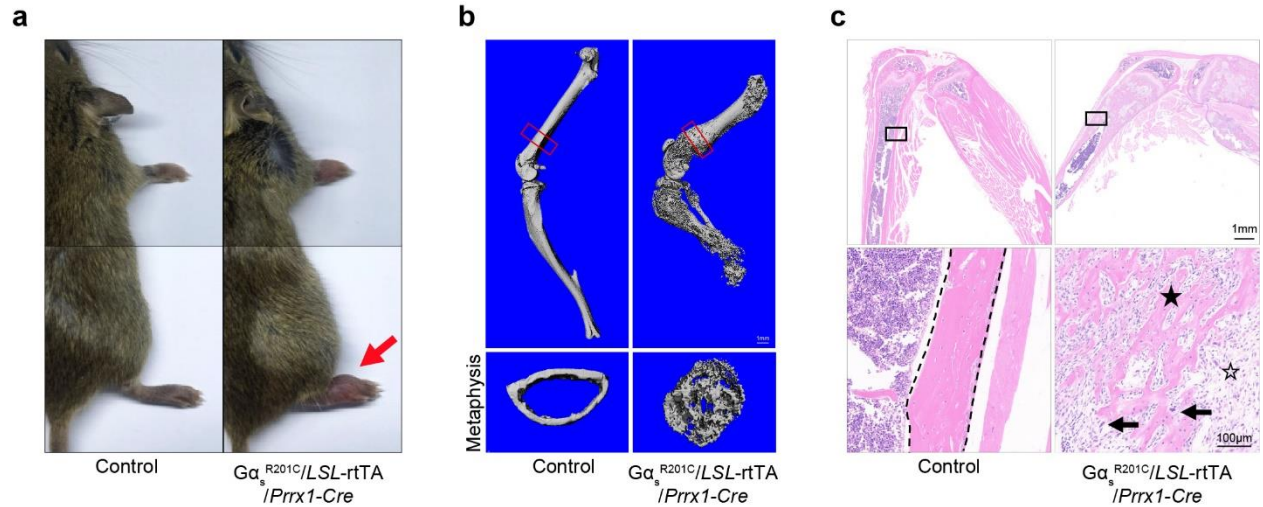

**Supplementary Fig. 3. Phenotypic characteristics of FD mice.** (a) Representative images showing swollen limbs (red arrow) in the Tet- $G\alpha_s^{R201C}/LSL-rtTA/Prrx1-Cre$  mice (FD mice) compared with the control mice. (b) Representative images of three-dimensional reconstruction of limb bones from FD mice revealed bone deformity, with expansile lesions observed in cross sections of the metaphysis ROI. (c) H&E staining showing typical FD-like histopathological features in FD mice, including irregularly shaped, undermineralized woven bone (black star) lacking osteoblast rimming and embedded within a fibrocellular matrix (white star). Multinucleated osteoclasts (black arrows) were evident on the surfaces of woven bone in FD mice.

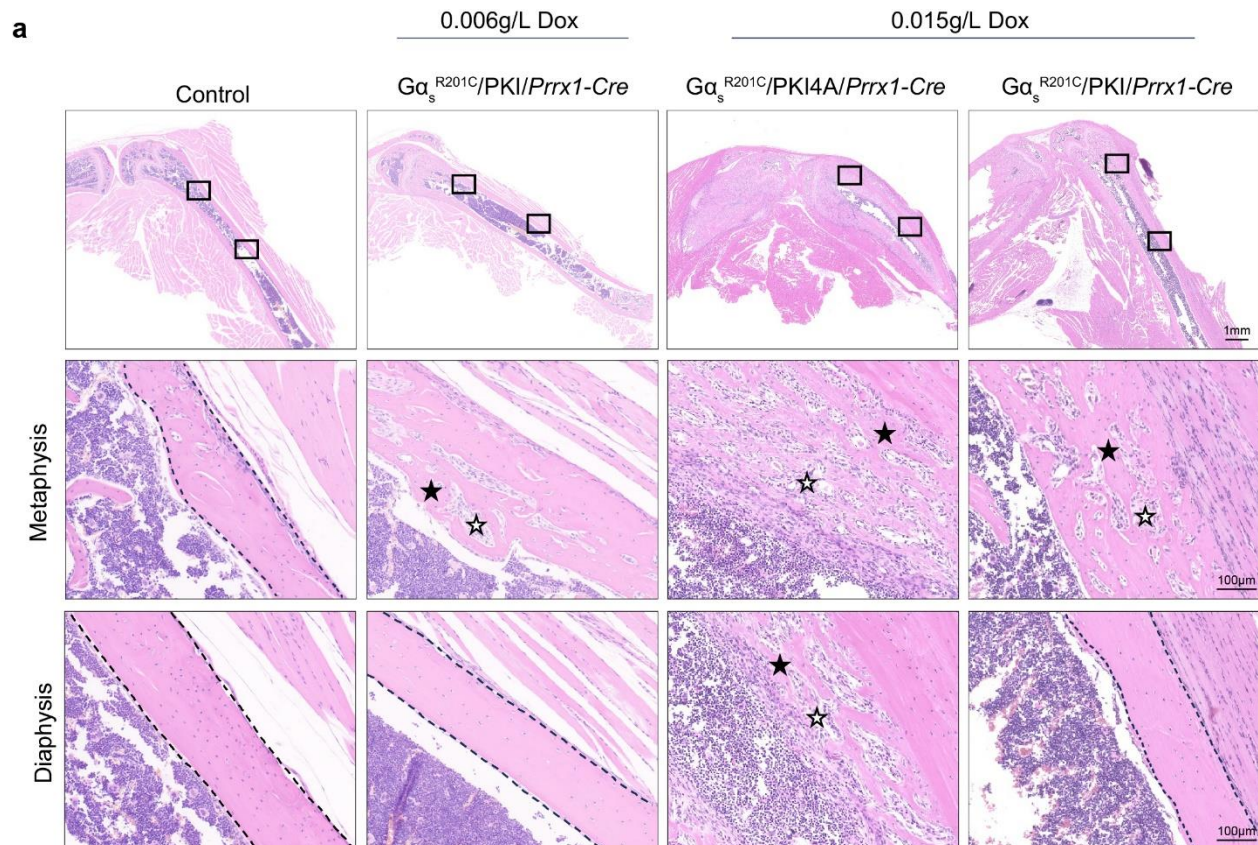

**Supplementary Fig. 4. Restricted FD-like lesions in FD-PKI mice.** (a) H&E staining showing limited FD-like lesions in FD-PKI mice. With a dosing regimen of 0.006 g/L Dox for 2 weeks, only 3 out of 15 FD-PKI mice developed limited FD-like lesions. As the Dox dose increased to 0.015 g/L, the extent of FD-like lesions in FD-PKI mice expanded, accordingly; however, the lesion areas remained significantly smaller than those observed in FD-PKI4A mice under the same induction conditions. These FD-like lesions, characterized by irregularly shaped, undermineralized woven bone (black star) lacking osteoblast rimming and embedded in a fibrocellular matrix (white star), were localized to the metaphysis and did not extend into the bone marrow cavity.

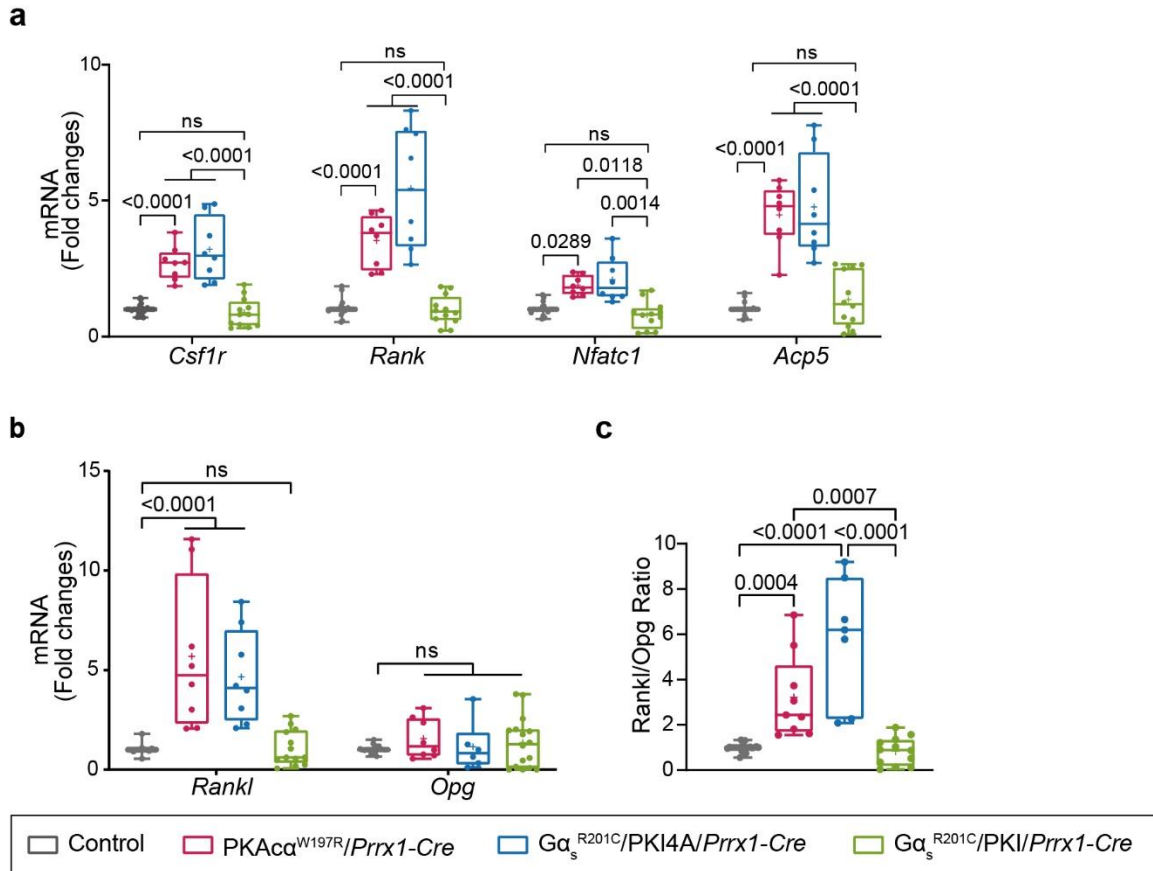

**Supplementary Fig. 5. Changes of osteoclast markers and Rankl signaling following PKA modulation.** (a) qPCR analyses showing osteoclast markers expression levels in bone tissue ( $n \geq 6$ , two-way ANOVA). (b) qPCR analyses showing *Rankl* and *Opg* mRNA expression levels in the bone tissue ( $n \geq 5$ , one-way ANOVA). (c) qPCR analysis of the Rankl/Opg ratio in bone tissue ( $n \geq 5$ , one-way ANOVA). The data are presented as box-and-whisker plots, with boxes representing the interquartile range (25th–75th percentiles), the minimum and maximum values reached by bars, the median plotted as a line in the middle, and the mean marked as “+”.



**a**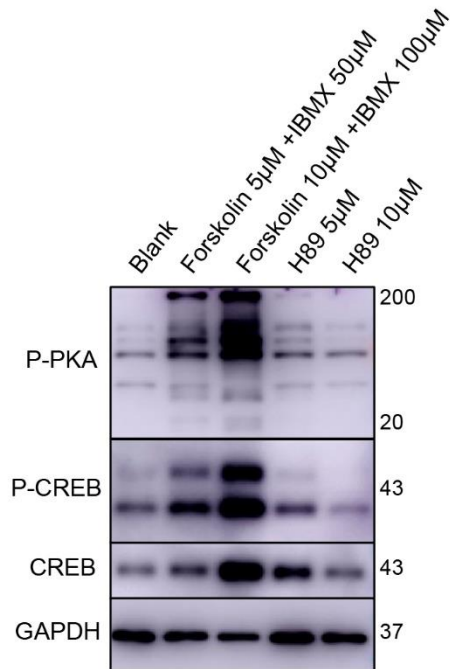**b**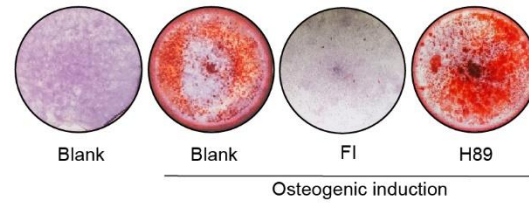**c**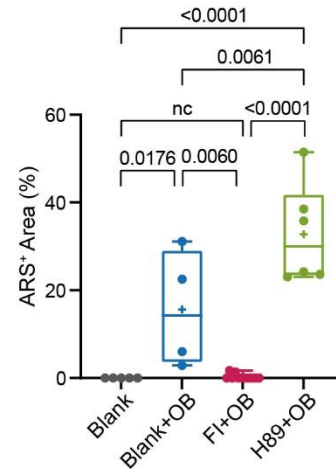

**Supplementary Fig. 6. PKA regulates osteoblast differentiation *in vitro*.** (a) Immunoblotting revealed that phosphorylated PKA and phosphorylated CREB levels in MC3T3-E1-14 cells increased following treatment with forskolin and 3-isobutyl-1-methylxanthine (FI) and decreased with the addition of the PKA inhibitor H89. (b) Representative images of alizarin red staining (ARS) and (c) quantification of the ARS+ area demonstrated that upregulation of PKA suppressed calcium nodule formation, whereas downregulation of PKA promoted calcium nodule formation. The data are presented as box-and-whisker plots, with boxes representing the interquartile range (25th–75th percentiles), the minimum and maximum values reached by bars, the median plotted as a line in the middle, and the mean marked as “+”.
